# Supplementary material
Source: PubMed Central journal article supplement (PMC3746005)
Supplement: NIHMS142436-supplement-supplement_1.pdf [file NIHMS142436-supplement-supplement_1.pdf]

**Supplementary Data Legend:**

Supplementary Table 1 (\*.doc): Correlations between ASR and PPI at each prepulse intensity in the B6 and CSS strains.

Supplementary Table 1: Correlations between ASR and PPI at each prepulse intensity in the B6 and CSS strains.

| <b>Strain</b>  | <b>70 dB PPI</b> | <b>75 db PPI</b> | <b>80 db PPI</b> | <b>85 db PPI</b> |
|----------------|------------------|------------------|------------------|------------------|
| <b>B6</b>      | -0.164           | -0.232**         | -0.358**         | -0.268**         |
| <b>All CSS</b> | -0.167**         | -0.232**         | -0.344**         | -0.252**         |
| <b>CSS-1</b>   | -0.442           | -0.303           | -0.266           | -0.499*          |
| <b>CSS-2</b>   | -0.062           | -0.050           | -0.229           | 0.006            |
| <b>CSS-3</b>   | -0.061           | -0.193           | -0.062           | 0.140            |
| <b>CSS-4</b>   | -0.059           | -0.105           | 0.332            | 0.325            |
| <b>CSS-5</b>   | -0.407*          | -0.497*          | -0.474*          | -0.481*          |
| <b>CSS-6</b>   | 0.332            | -0.309           | -0.255           | -0.194           |
| <b>CSS-7</b>   | -0.502*          | -0.565**         | -0.624**         | -0.708**         |
| <b>CSS-8</b>   | -0.195           | -0.101           | -0.166           | -0.135           |
| <b>CSS-9</b>   | -0.258           | 0.047            | -0.416*          | -0.045           |
| <b>CSS-10</b>  | 0.216            | -0.275           | -0.039           | -0.151           |
| <b>CSS-11</b>  | -0.119           | -0.501*          | -0.429*          | -0.377           |
| <b>CSS-12</b>  | -0.208           | -0.046           | -0.144           | -0.356           |
| <b>CSS-14</b>  | 0.417            | 0.399            | 0.296            | 0.220            |
| <b>CSS-15</b>  | -0.385           | 0.101            | -0.129           | -0.103           |
| <b>CSS-16</b>  | -0.505           | -0.290           | -0.519           | -0.320           |
| <b>CSS-17</b>  | -0.114           | -0.151           | -0.472           | -0.359           |
| <b>CSS-18</b>  | -0.065           | 0.167            | -0.295           | -0.313           |
| <b>CSS-19</b>  | -0.310           | -0.003           | -0.127           | -0.019           |
| <b>CSS-X</b>   | -0.236           | 0.112            | -0.152           | 0.148            |
| <b>CSS-Y</b>   | 0.049            | 0.088            | -0.151           | -0.095           |
| <b>CSS-mt</b>  | -0.127           | -0.275           | -0.425*          | -0.188           |

Pearson's correlations were calculated using mean values for acoustic startle response (ASR) and prepulse inhibition (PPI) at 70, 75, 80, and 85 dB prepulse intensities for each CSS and for all CSSs as a group. Correlations for B6 mice presented in Table 2 are included for comparison. Significance levels (2-tailed): \* $p < 0.05$ , \*\* $p < 0.01$ .
